# Supplementary material for: Thyroid Hormone Sensitizes the Imprinting-Associated Induction of Biological Motion Preference in Domestic Chicks
Source: Front Physiol. 2018 Dec 18;9:1740. doi: 10.3389/fphys.2018.01740 (PMC6305540; doi:10.3389/fphys.2018.01740)
Supplement: Supplementary Table 1 — Behavioral data of individuals. [file Table_1.XLSX]

## Sheet: Sheet1
sex	treatment and age	locomotor activity during training				first test of BM preference (stay time in sec)		second test of BM preference (stay time in sec)		sum of the two BM test scores (sec)				first test of imprinting (stay time in sec)		second test of imprinting (stay time in sec)		sum of the two imprinting test scores (sec)
		first 1-hour session	second 1-hour session	total		Walking chick	Linear chick	Walking chick	Linear chick	Walking chick	Linear chick	Walking - Linear		Lego(Red)	Lego(Yellow)	Lego(Red)	Lego(Yellow)	Lego(Red)	Lego(Yellow)	Red-Yellow
female	T3day4	4	647	651		241	0	135	94	376	94	282		288	4	258	0	546	4	542
female	T3day4	2	236	238		129	0	220	0	349	0	349		298	0	298	0	596	0	596
male	T3day4	884	1618	2502		65	49	231	21	296	70	226		49	209	233	34	282	243	39
male	T3day4	0	0	0		0	0	0	0	0	0	0		0	0	0	0	0	0	0
male	T3day4	142	1428	1570		153	18	64	104	217	122	95		216	41	281	0	497	41	456
female	T3day4	818	2819	3637		298	0	31	192	329	192	137		299	0	86	213	385	213	172
male	T3day4	184	1102	1286		0	117	51	38	51	155	-104		231	0	287	0	518	0	518
male	T3day4	380	1385	1765		111	109	203	19	314	128	186		299	0	300	0	599	0	599
female	T3day4	67	443	510		166	0	0	219	166	219	-53		255	0	114	89	369	89	280
female	T3day4	209	514	723		0	94	132	0	132	94	38		63	88	140	12	203	100	103
male	T3day4	0	861	861		61	108	71	55	132	163	-31		198	0	300	0	498	0	498
female	T3day4	149	1018	1167		95	85	217	10	312	95	217		275	0	300	0	575	0	575
female	T3day4_control	65	6	71		0	0	4	0	4	0	4		56	0	0	144	56	144	-88
male	T3day4_control	0	0	0		0	0	0	0	0	0	0		0	0	0	0	0	0	0
female	T3day4_control	1941	763	2704		144	121	89	216	233	337	-104		109	141	56	169	165	310	-145
female	T3day4_control	0	740	740		0	0	96	14	96	14	82		0	56	112	0	112	56	56
male	T3day4_control	43	234	277		13	0	0	0	13	0	13		31	66	243	49	274	115	159
female	T3day4_control	27	173	200		299	0	0	0	299	0	299		0	0	0	0	0	0	0
male	T3day4_control	4	78	82		51	0	0	169	51	169	-118		106	0	0	219	106	219	-113
male	T3day4_control	111	95	206		55	0	0	81	55	81	-26		116	3	59	131	175	134	41
female	T3day4_control	411	198	609		0	155	22	97	22	252	-230		41	39	38	33	79	72	7
female	T3day4_control	701	1638	2339		48	6	0	0	48	6	42		81	0	34	119	115	119	-4
male	T3day4_control	0	618	618		99	0	56	16	155	16	139		0	161	224	49	224	210	14
female	T3day4_control	994	1192	2186		133	104	91	118	224	222	2		168	32	101	182	269	214	55
female	IOPday1	1758	2118	3876		0	0	0	55	0	55	-55		262	0	289	0	551	0	551
female	IOPday1	65	1941	2006		0	89	284	0	284	89	195		130	155	248	44	378	199	179
female	IOPday1	287	250	537		13	41	155	0	168	41	127		99	68	4	181	103	249	-146
male	IOPday1	282	842	1124		212	0	0	241	212	241	-29		191	6	0	230	191	236	-45
female	IOPday1	0	0	0		0	0	0	0	0	0	0		0	0	0	0	0	0	0
male	IOPday1	4	219	223		0	0	0	298	0	298	-298		0	51	201	0	201	51	150
male	IOPday1	0	0	0		0	0	0	0	0	0	0		0	0	0	0	0	0	0
male	IOPday1	142	509	651		112	0	0	56	112	56	56		31	193	151	109	182	302	-120
female	IOPday1	941	1747	2688		0	0	111	17	111	17	94		91	205	266	18	357	223	134
female	IOPday1	985	1044	2029		150	130	0	291	150	421	-271		43	163	161	82	204	245	-41
female	IOPday1	1375	1235	2610		97	0	40	155	137	155	-18		251	0	0	300	251	300	-49
male	IOPday1	261	342	603		188	0	31	231	219	231	-12		159	14	0	203	159	217	-58
male	IOPday1_control	658	2123	2781		156	44	218	0	374	44	330		295	0	289	0	584	0	584
female	IOPday1_control	1804	2976	4780		4	59	288	0	292	59	233		299	0	299	0	598	0	598
female	IOPday1_control	715	1835	2550		222	0	104	41	326	41	285		203	74	299	0	502	74	428
male	IOPday1_control	2094	3118	5212		104	164	91	218	195	382	-187		189	110	256	29	445	139	306
male	IOPday1_control	1545	2313	3858		144	0	54	128	198	128	70		286	0	294	0	580	0	580
female	IOPday1_control	147	294	441		0	234	291	0	291	234	57		155	0	213	41	368	41	327
female	IOPday1_control	1047	1526	2573		259	0	281	0	540	0	540		281	0	295	0	576	0	576
male	IOPday1_control	755	1509	2264		204	0	230	0	434	0	434		270	0	281	0	551	0	551
male	IOPday1_control	40	957	997		0	203	289	0	289	203	86		296	0	296	0	592	0	592
female	IOPday1_control	408	680	1088		103	4	32	88	135	92	43		267	0	296	0	563	0	563
